# Supplementary material
Source: PubMed Central journal article supplement (PMC519119)

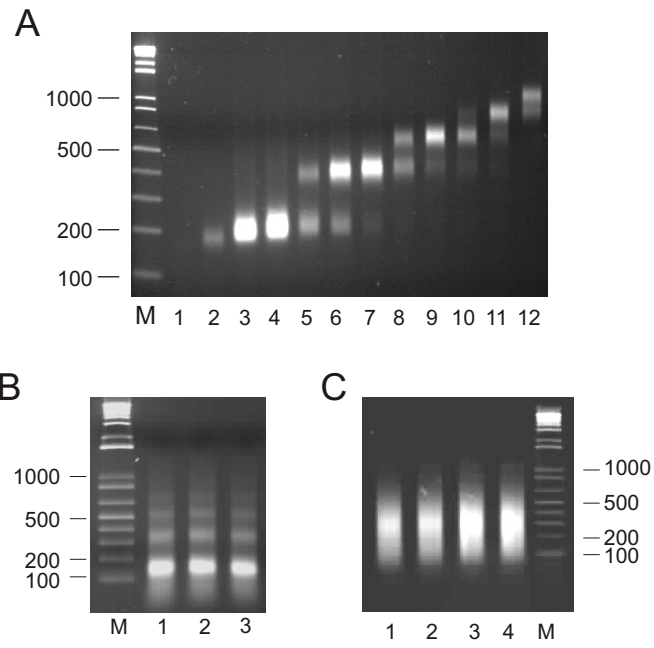

Supplement: nar_32_16_4903__1.pdf [file nar_32_16_4903__1.pdf]
